## Imputation of PaO<sub>2</sub> from SpO<sub>2</sub> values from the MIMIC-III Critical Care Database Using Machine-Learning Based Algorithms

Shuangxia Ren, PhD<sup>1\*</sup>, Jill Zupetic, MD<sup>2,3\*</sup>, Mehdi Nouraie, MD PhD<sup>2,3</sup>, Xinghua Lu, PhD<sup>1,4</sup>,  
Richard D. Boyce, PhD<sup>1,4</sup>, Janet S. Lee, MD<sup>2,3</sup>

<sup>1</sup>Intelligent Systems Program, University of Pittsburgh, Pittsburgh, PA, USA;

<sup>2</sup>Division of Pulmonary, Allergy, and Critical Care Medicine, University of Pittsburgh,  
Pittsburgh, PA, USA;

<sup>3</sup>Acute Lung Injury Center of Excellence, Department of Medicine, University of Pittsburgh,  
Pittsburgh, PA, USA

<sup>4</sup>Department of Biomedical Informatics, University of Pittsburgh, Pittsburgh, PA, USA

\*these authors contributed equally to merit first authorship

To whom correspondence should be addressed: Janet S. Lee, MD, 3459 Fifth Avenue,  
Montefiore University Hospital NW628, Pittsburgh, PA, 15213, U.S.A.; fax: 412.692-2260;  
email: leejs3@upmc.edu; tel: 412.692.2328

**COI:** J.S. Lee discloses a paid consultantship with Janssen Pharmaceuticals, Inc. unrelated to  
this study. The authors have no other relevant conflicts of interest to disclose.

**Abbreviations List:**

PaO<sub>2</sub>= partial pressure of oxygen

FIO<sub>2</sub>= fraction of oxygen

PaO<sub>2</sub>/FIO<sub>2</sub>= PF ratio

SpO<sub>2</sub>= peripheral saturation of oxygen

PEEP= positive end expiratory pressure

TV= tidal volume

MAP= mean arterial pressure

## Abstract

**Background:** The partial pressure of oxygen (PaO<sub>2</sub>)/fraction of oxygen delivered (FIO<sub>2</sub>) ratio is the reference standard for assessment of hypoxemia in mechanically ventilated patients. Non-invasive monitoring with the peripheral saturation of oxygen (SpO<sub>2</sub>) is increasingly utilized to estimate PaO<sub>2</sub> because it does not require invasive sampling. Several equations have been reported to impute PaO<sub>2</sub>/FIO<sub>2</sub> from SpO<sub>2</sub> /FIO<sub>2</sub>. However, machine-learning algorithms to impute the PaO<sub>2</sub> from the SpO<sub>2</sub> has not been compared to published equations.

**Research Question:** How do machine learning algorithms perform at predicting the PaO<sub>2</sub> from SpO<sub>2</sub> compared to previously published equations?

**Methods:** Three machine learning algorithms (neural network, regression, and kernel-based methods) were developed using 7 clinical variable features (n=9,900 ICU events) and subsequently 3 features (n=20,198 ICU events) as input into the models from data available in mechanically ventilated patients from the Medical Information Mart for Intensive Care (MIMIC) III database. As a regression task, the machine learning models were used to impute PaO<sub>2</sub> values. As a classification task, the models were used to predict patients with moderate-to-severe hypoxemic respiratory failure based on a clinically relevant cut-off of PaO<sub>2</sub>/FIO<sub>2</sub> ≤ 150. The accuracy of the machine learning models was compared to published log-linear and non-linear equations. An online imputation calculator was created.

**Results:** Compared to seven features, three features (SpO<sub>2</sub>, FiO<sub>2</sub> and PEEP) were sufficient to impute PaO<sub>2</sub>/FIO<sub>2</sub> ratio using a large dataset. Any of the tested machine learning models enabled imputation of PaO<sub>2</sub>/FIO<sub>2</sub> from the SpO<sub>2</sub>/FIO<sub>2</sub> with lower error and had greater accuracy in predicting PaO<sub>2</sub>/FIO<sub>2</sub> ≤ 150 compared to published equations. Using three features, the machine learning models showed superior performance in imputing PaO<sub>2</sub> across the entire span of SpO<sub>2</sub> values, including those ≥ 97%.

**Interpretation:** The improved performance shown for the machine learning algorithms suggests a promising framework for future use in large datasets.

## Introduction:

The PaO<sub>2</sub> as a ratio of the fraction of oxygen (FIO<sub>2</sub>) delivered, or the PaO<sub>2</sub>/FIO<sub>2</sub>, is the reference standard measurement for assessment of hypoxemia in mechanically ventilated patients with respiratory failure. The PaO<sub>2</sub>/FIO<sub>2</sub> ratio (PF ratio) has predictive value for mortality in patients with acute respiratory distress syndrome (ARDS)<sup>1</sup> and is also part of a severity index scoring system called the Sequential Organ Failure Assessment (SOFA) score that is used to predict mortality in patients with critical illness<sup>2-4</sup>. Additionally, the PaO<sub>2</sub>/FIO<sub>2</sub> ratio has become relevant in clinical decision-making including the decision to initiate prone positioning in ARDS patients with PF ratios less than 150<sup>5</sup>. Current measurement of the PaO<sub>2</sub>/FIO<sub>2</sub> ratio requires invasive arterial blood gas sampling and does not provide a continuous measure of the patient's oxygenation. Increasingly, non-invasive monitoring with pulse oximetry is utilized instead of ABGs<sup>6,7</sup>, particularly in low-resource settings where an ABG lab or invasive arterial blood monitoring are not readily available or required. In addition, several studies have evaluated the non-invasive SpO<sub>2</sub> (peripheral saturation of oxygen)/FIO<sub>2</sub> ratio as a surrogate for PaO<sub>2</sub>/FIO<sub>2</sub> ratio in children where non-invasive measurements are becoming more common<sup>8-10</sup>.

A few studies have examined non-linear imputation of PaO<sub>2</sub>/FIO<sub>2</sub> from SpO<sub>2</sub>/FIO<sub>2</sub> measurements recorded at the same time<sup>11,12</sup>. These studies have reported that the accuracy of non-linear imputation is superior to log-linear or linear imputation, especially for moderate to severe hypoxemic respiratory failure with ARDS<sup>11,13</sup>. However, in patients with respiratory failure requiring mechanical ventilation, the optimal equation for imputation of PaO<sub>2</sub>/FIO<sub>2</sub> from the SpO<sub>2</sub>/FIO<sub>2</sub> remains unclear. An algorithm to accurately impute the PaO<sub>2</sub> from the SpO<sub>2</sub> in mechanically ventilated patients would be beneficial for clinical research to facilitate recruitment of patients for clinical trials if an ABG is not available. Ideally, this approach would involve only the introduction of variables that may contribute to the relationship between SpO<sub>2</sub> and PaO<sub>2</sub> but would not require the same invasive ABG measurement as the PaO<sub>2</sub>.

The objective of this study is to develop a machine learning algorithm to impute PaO<sub>2</sub>/FIO<sub>2</sub> from SpO<sub>2</sub>/FIO<sub>2</sub> among mechanically ventilated patients in the Medical Information Mart for Intensive Care (MIMIC) III database<sup>14</sup> and compare it to the previously published non-linear and log-linear equations<sup>11,13</sup>. In this study, three common machine learning approaches (neural network<sup>15</sup>,

regression<sup>16</sup>, and kernel-based methods<sup>17,18</sup>) were tested for regression and classification of PaO<sub>2</sub>/FIO<sub>2</sub> using data available in MIMIC III<sup>19</sup> with 7 clinical variable features and a subsequent 3 features model. We created models to perform a regression task to impute PaO<sub>2</sub> from SpO<sub>2</sub> values and a classification task to predict patients with moderate to severe hypoxemic respiratory failure based on a cut-off of a predicted PF ratio  $\leq 150$ <sup>11</sup>. Our overall hypothesis was that a machine learning algorithm would perform better in predicting the PaO<sub>2</sub> from SpO<sub>2</sub> across the entire span of SpO<sub>2</sub> values when compared to the published equations.

## Methods

The MIMIC-III database v1.4 (<https://mimic.physionet.org>) is an openly available dataset developed by the Massachusetts Institute of Technology Lab for Computational Physiology<sup>14</sup>. It contains de-identified health data associated with approximately 60,000 intensive care unit admissions. MIMIC-III is a relational database that contains information on demographics, vital signs, mechanical ventilation status, laboratory tests, medications, and mortality. Our study was determined by the University of Pittsburgh Institutional Review Board to be exempt (STUDY19100068).

### *Data processing*

We queried the MIMIC-III database to identify unique ICU encounters (icustay\_id) with mechanical ventilation status. We next identified the lab event PaO<sub>2</sub> and chart event SpO<sub>2</sub> occurring at the same time of the mechanical ventilation status. In order to minimize error between matched PaO<sub>2</sub> and SpO<sub>2</sub>, we constrained the time gap between the lab event PaO<sub>2</sub> and the chart event SpO<sub>2</sub> to the closest time within 30 minutes. To minimize repeated sampling from the same subjects, we restricted the search of PaO<sub>2</sub> measurements to within the first 24 hours of mechanical ventilation duration and obtained the first PaO<sub>2</sub> recorded within this time frame. We constrained the time gap to within 2 hours of the selected SpO<sub>2</sub> measurement for variables from chart events such as tidal volume (TV), positive end-expiratory pressure (PEEP), FiO<sub>2</sub>, temperature, and mean arterial pressure (MAP). We did the same for lab events such as SaO<sub>2</sub>. If a patient was treated with vasoactive infusions, it was recorded as a categorical variable. Data extraction and processing methods are available at <https://github.com/rengshuangxia/Predict-PaO2-with-SpO2><sup>20</sup>.

### *Machine learning methods for regression task*

For the regression task we implemented 3 different models – a neural network model, a linear regression model, and support vector regression (SVR), a type of kernel-based modeling. For each model, we applied a 10-fold cross-validation<sup>21</sup>.

For the neural network model, we tested different network structures and various numbers of features to arrive at two models used for comparison with the linear and support vector regression models. One model used seven input features and three hidden layers (16, 8, 5 neurons for layers 1 to 3). The other model used only three input features and two hidden layers (6, 3 neurons for layers 1 and 2). Both final models used a tangent activation function for all layers except the output layer which used a linear function in both models. Also, both models were trained for 200 epochs with Adam optimizer using gradient descent. The learning rate was 0.001 and the batch sizes were 50 for both models.

For the linear regression model, the output variable can be computed by a linear combination of the input variables. We trained the linear regression equation by the Ordinary Least Squares approach. We used the `linear_model.LinearRegression` method from `scikit-learn 0.22` (<https://scikit-learn.org/stable/>) with default hyperparameters for predicting PaO<sub>2</sub> values.

For the SVR model, we tested multiple kernels including linear kernel, polynomial kernel, and radical basis function kernel (RBF). Based on the performance in the training data, the RBF kernel was selected.

#### *Machine learning methods for classification task*

In patients meeting criteria for ARDS, the PaO<sub>2</sub>/FIO<sub>2</sub>  $\leq$  150 has been used to capture those patients with moderate to severe disease<sup>11,13</sup>. We utilized this cut-off to test machine learning methods to predict this diagnostic threshold PaO<sub>2</sub>/FIO<sub>2</sub>  $\leq$  150 for the different imputation techniques. We implemented 3 classification models including Neural Network, Logistic Regression and Support Vector Machine (SVM).

For each of machine learning model we applied a 10-fold cross-validation and calculated the sensitivity, specificity, likelihood ratios, diagnostic odds ratio (OR), Area under receiver operating

characteristic curve (AUROC), F1 score and Bayesian information Criterion (BIC) to compare across models. The two neural network models for classification were similar to the neural networks used in regression, except the output layer used the sigmoid function. As with the regression models, various topologies were tested to arrive at the final two multi-layer perceptron (MLP) classifiers, one with an input size of 7 features and the other with an input size of 3 features. The hidden layer size is (12, 8, 6, 4, 4) for the model with 7 input features. For the other model which utilizes only 3 input features, we used two hidden layers of size 6 and 3. All hidden layers used the tangent activation function. We trained both models for 200 iterations with Adam optimizer, setting 7 feature classifier momentum value as 0.8 and 3 feature classifier momentum value as 0.6. The learning rate was 0.001 and the batch sizes was 200 for both models.

In addition, we implemented a basic logistic regression model for classification purposes as well as the SVM model which classifies examples with an optimal hyperplane. For the logistic regression, it uses logistic function to model a binary dependent variable. We utilized the `linear_model.LogisticRegression` method provided in the scikit-learn library without regularization, and other arguments were set as default. For the SVM model, we compared the results by applying different kernels and the RBF kernel outperformed other kernels. Methods were similar to those used in the regression task.

#### *Comparison of machine-learning based algorithm to published non-linear and log-linear equations*

We compared the performance of our machine learning algorithms to the previously published equations. For the non-linear equation from Brown *et al*<sup>11</sup> the PaO<sub>2</sub> was imputed from the SpO<sub>2</sub>, where PO<sub>2</sub> = PaO<sub>2</sub>, S = SpO<sub>2</sub> and F=FiO<sub>2</sub>. For situations where the recorded SpO<sub>2</sub> was 100% (or, 1.0), the SpO<sub>2</sub> was substituted with 0.996 given that the equation would not permit the calculation of S=1.0.

$$PO_2 = \left\{ \frac{11,700}{(1/S - 1)} + \left[ 50^3 + \left( \frac{11,700}{1/S - 1} \right)^2 \right]^{1/2} \right\}^{1/3}$$

$$+ \left\{ \frac{11,700}{(1/S - 1)} - \left[ 50^3 + \left( \frac{11,700}{1/S - 1} \right)^2 \right]^{1/2} \right\}^{1/3}$$

For the log-linear equation from Pandharipande, et al<sup>11,13</sup>, the PaO<sub>2</sub>:FIO<sub>2</sub> was imputed from SpO<sub>2</sub>:FIO<sub>2</sub> utilizing the equation:

$$PO_2 = F \cdot 10^{\left(0.48 + 0.78 \cdot \log_{10}\left(\frac{S}{F}\right)\right)}$$

## Results

*A parsimonious three features model is sufficient to impute PaO<sub>2</sub>/FIO<sub>2</sub> ratio using a large dataset*

An overview of the machine learning tasks are outlined in Figure 1. We initially chose 7 relevant features from the chart events (SpO<sub>2</sub>, FiO<sub>2</sub>, TV, MAP, temperature, PEEP and vasopressor administration) representing recorded bedside measurements that were independent from an invasive arterial blood gas measurement. When applying the 7 features to impute PaO<sub>2</sub>/FiO<sub>2</sub>, the final data set contained 9,900 unique ICU encounters from 9,302 mechanically ventilated patients (Supplementary Table e1). The relationship between SpO<sub>2</sub>/FiO<sub>2</sub> (S/F) and the PaO<sub>2</sub>/FiO<sub>2</sub> (P/F) was examined in dataset 1 containing 9,900 unique ICU events from the MIMIC-III database and was best described by a log-linear relationship between the transformed logarithmic value of the SF and PF ratios as previously described by Pandharipande, et al<sup>13</sup> (Supplementary Figure e1). The relationship between S/F and P/F ratios showed high variance across the distribution of mechanically ventilated subjects ( $R^2 = 0.21$ ).

For the regression task, we derived the RMSE and BIC for each of the different 7 feature machine learning models (neural network, linear regression, support vector regression) to assess the performance of the imputation techniques. The RMSE and BIC of the three machine learning methods are shown in Supplementary Table e2. All the machine learning models outperformed the previously published non-linear and log-linear equations as shown by lower RMSE scores. For the



classification task, the three machine learning methods achieved similar classification performance according to F1 scores, as shown in Supplementary Table e3.

To improve practicality of the method at the bedside, we attempted to use the smallest number of features possible to predict PaO<sub>2</sub> or PaO<sub>2</sub>/FiO<sub>2</sub> ratio from the regression and classification tasks, respectively. Compared to the other measured variables, PEEP had the strongest correlation with PaO<sub>2</sub>/FiO<sub>2</sub> ( $r = -0.31$ ) outside of the SF ratio (SpO<sub>2</sub>/FiO<sub>2</sub>) (Table 1). Using this information, we created a 3-features model using SpO<sub>2</sub>, FIO<sub>2</sub> and PEEP. As compared to seven features, three features were sufficient to impute PaO<sub>2</sub>/FIO<sub>2</sub> ratio with a similar degree of accuracy in part due to the ability to include significantly more subjects. The 3 features model was therefore utilized in the remainder of the analysis. The final 3 features data set (dataset 2) contained 20,198 ICU encounters from 17,818 unique patients (Table 2). Forty percent of subjects were of female sex and the mean age was 64 years. The degree of hypoxemic respiratory failure, as measured by the PaO<sub>2</sub>/FIO<sub>2</sub> ratio<sup>1</sup>, showed a distribution in which 26% had mild respiratory failure (PaO<sub>2</sub>/FIO<sub>2</sub> = 201-300), 22% had moderate respiratory failure (PaO<sub>2</sub>/FIO<sub>2</sub> = 101-200), and 8% had severe respiratory failure (PaO<sub>2</sub>/FIO<sub>2</sub> ≤ 100).

#### *Machine learning models show improved performance when compared to the prior published equations for regression*

We quantitatively derived the RMSE for all the machine learning and previously published models and the BIC for each of the three machine learning models to assess the performance of the different imputation techniques (Table 3). The RMSE of the neural network, linear regression and support vector regression machine learning models were 84.7, 88.8 and 85.9, respectively, compared to 117.7 and 91.8 for the log-linear and non-linear equations. The lower RMSE values indicate that the 3 machine learning models outperformed the previously published equations. Of the machine learning models, the neural network method showed the lowest RMSE as well as the lowest BIC in both the whole dataset (dataset 2) and for SpO<sub>2</sub> <97% (subset 2), and thus was chosen as the “best” overall model for the regression task. A Bland-Altman Plot suggests that the neural network model is comparable to the published equations. There was decreasing accuracy at higher PaO<sub>2</sub>/FIO<sub>2</sub> ratios for all the methods examined (Supplementary Figure e2).

### *Machine learning models show improved performance for the classification task*

We compared the performance of the machine learning models with the log-linear and non-linear equations using F1 scores. Similar to the findings for the regression task, all three machine learning models performed better in the whole dataset than log-linear and non-linear equations (Table 4). When the dataset was limited to SpO<sub>2</sub> < 97% (subset 2), the machine-learning methods performed slightly better than log-linear and better than non-linear equations, respectively (Table 4). The F1 scores for all three machine learning methods were similar when using the whole dataset (dataset 2) and for subset 2 where SpO<sub>2</sub> < 97%. As shown in Figure 2, when comparing the 3 machine learning models to one another, the neural network preformed slightly better in the whole dataset (area under the precision recall curve = 0.94 for the neural network compared to 0.93 and 0.91 for the logistic regression and support vector machine model, respectively). The 3 models had similar performance in subset 2.

### **Discussion**

We used the publicly available MIMIC-III database to develop and evaluate machine-learning algorithms to impute PaO<sub>2</sub>/FIO<sub>2</sub> from the SpO<sub>2</sub>/FIO<sub>2</sub> in patients who are mechanically ventilated. We tested three machine learning models (neural network, linear regression and SVR) first using seven available clinical variables SpO<sub>2</sub>, FIO<sub>2</sub>, PEEP, TV, MAP, temperature, and vasopressor administration to impute the PaO<sub>2</sub> and subsequently using only three clinical variables SpO<sub>2</sub>, FiO<sub>2</sub> and PEEP. The imputation of PaO<sub>2</sub> from the SpO<sub>2</sub> from the regression tasks enabled us to derive the PaO<sub>2</sub>/FIO<sub>2</sub>, a clinically meaningful ratio with predictive value<sup>1,22</sup>. Additionally, we performed a classification task to predict PaO<sub>2</sub>/FiO<sub>2</sub> ≤ 150, a cut off that has been used to capture those patients with moderate to severe respiratory failure in ARDS cohorts<sup>11,13</sup> and to guide patient management<sup>5</sup>.

To develop the machine learning algorithms, we evaluated clinical variables such as PEEP, TV, MAP, temperature, and vasopressor administration that are easily obtained at the bedside. We considered other clinical variables such as skin pigmentation, pulse oximeter location, oximeter manufacturer, vasopressor infusion, and laboratory variables such as serum bicarbonate, serum chloride, serum creatinine, serum sodium but these variables added negligible improvement in the accuracy of imputation in a prospective study<sup>11</sup>. Therefore, these additional clinical variables were

not added to the model. Except for PEEP, other variables examined showed a stochastic distribution. Removing these unrelated features (VT, MAP, Temperature and vasopressor use) to create the 3 features model did not significantly alter the accuracy of the machine-learning based algorithms and provides a framework for the generalizability of the model for large datasets of mechanically ventilated patients.

Our study shows that a machine-learning based method for both the regression and classification task, when applied to the MIMIC-III critical care database, improved the accuracy when compared with the prior published non-linear, and log-linear imputation methods. As is evidenced by comparing the F1 and discrimination measures in Table 4, the performance improvement was more modest for the classification task in subset 2 where SpO<sub>2</sub> <97%. A possible explanation is that there were fewer ICU events (smaller N) per group in the subset.

Prior studies have examined the relationship between SpO<sub>2</sub>/FIO<sub>2</sub> (SF) and PaO<sub>2</sub>/FIO<sub>2</sub> (PF) ratios for patients with ARDS to determine whether the non-invasive SF ratio can be substituted for the invasively obtained PF ratio<sup>11,13,23</sup>. Panharipande, et al studied matched measurements of SpO<sub>2</sub> and PaO<sub>2</sub> of a more heterogenous population to determine the association between SF and PF ratios in order to calculate the respiratory parameter of the SOFA score<sup>13</sup>. In their study, matched SpO<sub>2</sub> and PaO<sub>2</sub> values were obtained from two groups of patients: Group 1 comprised of the derivation set and was obtained from patients undergoing general anesthesia from a single center, and Group 2 comprised of a validation set and was obtained from patients enrolled in the multi-center randomized clinical trial examining low versus high tidal volume for acute respiratory management of ARDS (ARMA)<sup>24</sup>. All SpO<sub>2</sub> values > 97% were also excluded from analysis in order to maximize matched data to those values likely to be within the linear range of the oxyhemoglobin dissociation curve. Data from 4,728 matched SpO<sub>2</sub> and PaO<sub>2</sub> measurements showed that the relationship was best described by a log-linear equation with slight variation based upon the level of PEEP. In the setting of a more heterogenous population, a poorer correlation was noted between SF and PF ratios. The regression equation of  $\text{Log(PF)} = 0.48 + 0.78 \times \text{Log(SF)}$  yielded an R-square of 0.31<sup>13</sup>.

A retrospective analysis of enrollment arterial blood gas measurements from three ARDS Network studies compared the performance of non-linear, log-linear and linear imputation methods to derive PaO<sub>2</sub> from the SpO<sub>2</sub><sup>12</sup>. In all patients (N=1,184), the nonlinear imputation was equivalent to log-linear imputation. However, in those patients with SpO<sub>2</sub> < 97% (N=707), the nonlinear imputation showed lower error than either linear or log-linear equations. A prospective study was subsequently conducted in patients enrolled in the Prevention and Early Treatment of Acute Lung Injury network<sup>11</sup> to assess the performance of the non-linear equation to impute PaO<sub>2</sub> from the SpO<sub>2</sub> and compare it to the prior log-linear and linear equations<sup>11,13,23</sup>. This study included 1034 arterial blood gases from 703 patients, of which 650 arterial blood gases had matched SpO<sub>2</sub> < 97%. The non-linear equation showed lower error and better identified moderate to severe ARDS patients (defined in the study as PaO<sub>2</sub>/FIO<sub>2</sub> ≤ 150) when compared to log-linear or linear imputation methods.

In our study, we similarly found a high degree of variance across SpO<sub>2</sub> values and corresponding measured PaO<sub>2</sub> values which was noted when we formally examined the relationship between SpO<sub>2</sub>/FIO<sub>2</sub> and PaO<sub>2</sub>/FIO<sub>2</sub>. This may be attributed to the retrospective nature of the data collection and the numerous variables that may confound the reliability of a recorded SpO<sub>2</sub> measured non-invasively to reflect the arterial SaO<sub>2</sub><sup>8,10,12</sup>. Despite this limitation, the machine learning algorithms performed better on both regression and classification tasks when compared to the log-linear and non-linear published equations.

One strength of our study is the evaluation of all mechanically ventilated patients with available data rather than narrowing the analysis to a specific population such as those with ARDS. Given the inclusion of all mechanically ventilated patients, a significant number of SpO<sub>2</sub> values were > 97% (N=8,510 for 7 features and N=16,918 for 3 features). While this reduced the accuracy of the imputed PF ratio, particularly above a certain threshold, the machine learning models were applied to the data without a pre-defined restriction placed upon the range of SpO<sub>2</sub> values and showed better performance than both the log-linear and non-linear equations on both the regression and classification tasks. These results have not been tested on data other than MIMIC-III. Future work will need to test if the model is robust given potential variations in how the data for input features is collected and stored.

In summary, any of the tested machine learning models applied to MIMIC-III enabled imputation of PaO<sub>2</sub>/FIO<sub>2</sub> ratio from the SpO<sub>2</sub>/FIO<sub>2</sub> with lower error and greater accuracy in predicting PaO<sub>2</sub>/FIO<sub>2</sub> ≤ 150 than when compared to that of published equations across the entire range of SpO<sub>2</sub> examined. When compared to one another, all machine learning methods performed similarly. Given our goal of utilizing this type of modeling to allow for inclusion of mechanically ventilated patients from large datasets in the electronic health record, we opted to create a calculator for the neural network machine learning algorithm based on ease of utilization <https://drive.google.com/drive/folders/1AoieWO0w3BXvEpw6c0-OomjeQHzFJXY?usp=sharing>. Future studies will need to assess the generalizability of and improve upon the machine learning methods in mechanically ventilated patients to impute PaO<sub>2</sub>/FIO<sub>2</sub> measurements from SpO<sub>2</sub> values.

## **Acknowledgements:**

**Authorship:** *Contribution:* S.R. performed the data extraction and processing, analysis, and interpreted the data. J.Z. performed data analysis, interpreted the data and wrote the manuscript. R.B. and X.L. interpreted the data and revised the work for important intellectual content. M.N. provided critical statistical expertise, designed, analyzed, interpreted the data, and wrote the manuscript. J.S.L. conceived, designed, analyzed, interpreted the data, and wrote the manuscript. S.R. and J.Z. are the guarantors of the paper.

**Funding:** This work was supported by the National Heart, Lung, And Blood Institute of the National Institutes of Health under Award Numbers F32 HL152504 (J.Z.); P01 HL114453, R01 HL136143, R01 HL142084, K24 HL143285 (J.S.L.), and R01 LM012011 (X.L. and S.R.). The University of Pittsburgh holds a Physician-Scientist Institutional Award from the Burroughs Wellcome Fund (J.Z.); content is solely the responsibility of the authors and does not necessarily represent the official views of the National Institutes of Health or any other sponsoring agency.

## REFERENCES

1. Force ADT, Ranieri VM, Rubenfeld GD, et al. Acute respiratory distress syndrome: the Berlin Definition. *JAMA* 2012;307(23):2526-33. DOI: 10.1001/jama.2012.5669.
2. Vincent JL, Moreno R, Takala J, et al. The SOFA (Sepsis-related Organ Failure Assessment) score to describe organ dysfunction/failure. On behalf of the Working Group on Sepsis-Related Problems of the European Society of Intensive Care Medicine. *Intensive Care Med* 1996;22(7):707-10. DOI: 10.1007/bf01709751.
3. Ferreira FL, Bota DP, Bross A, Melot C, Vincent JL. Serial evaluation of the SOFA score to predict outcome in critically ill patients. *JAMA* 2001;286(14):1754-8. DOI: 10.1001/jama.286.14.1754.
4. Vincent JL, de Mendonca A, Cantraine F, et al. Use of the SOFA score to assess the incidence of organ dysfunction/failure in intensive care units: results of a multicenter, prospective study. Working group on "sepsis-related problems" of the European Society of Intensive Care Medicine. *Crit Care Med* 1998;26(11):1793-800. DOI: 10.1097/00003246-199811000-00016.
5. Guerin C, Reignier J, Richard JC, et al. Prone positioning in severe acute respiratory distress syndrome. *N Engl J Med* 2013;368(23):2159-68. DOI: 10.1056/NEJMoa1214103.
6. Garland A, Connors AF, Jr. Indwelling arterial catheters in the intensive care unit: necessary and beneficial, or a harmful crutch? *Am J Respir Crit Care Med* 2010;182(2):133-4. DOI: 10.1164/rccm.201003-0410ED.
7. Garland A. Arterial lines in the ICU: a call for rigorous controlled trials. *Chest* 2014;146(5):1155-1158. DOI: 10.1378/chest.14-1212.
8. Khemani RG, Patel NR, Bart RD, 3rd, Newth CJL. Comparison of the pulse oximetric saturation/fraction of inspired oxygen ratio and the PaO<sub>2</sub>/fraction of inspired oxygen ratio in children. *Chest* 2009;135(3):662-668. DOI: 10.1378/chest.08-2239.
9. Khemani RG, Thomas NJ, Venkatachalam V, et al. Comparison of SpO<sub>2</sub> to PaO<sub>2</sub> based markers of lung disease severity for children with acute lung injury. *Crit Care Med* 2012;40(4):1309-16. DOI: 10.1097/CCM.0b013e31823bc61b.
10. Lobete C, Medina A, Rey C, Mayordomo-Colunga J, Concha A, Menendez S. Correlation of oxygen saturation as measured by pulse oximetry/fraction of inspired oxygen ratio with Pao<sub>2</sub>/fraction of inspired oxygen ratio in a heterogeneous sample of critically ill children. *J Crit Care* 2013;28(4):538 e1-7. DOI: 10.1016/j.jcrc.2012.12.006.
11. Brown SM, Duggal A, Hou PC, et al. Nonlinear Imputation of PaO<sub>2</sub>/FIO<sub>2</sub> From SpO<sub>2</sub>/FIO<sub>2</sub> Among Mechanically Ventilated Patients in the ICU: A Prospective, Observational Study. *Crit Care Med* 2017;45(8):1317-1324. DOI: 10.1097/CCM.0000000000002514.
12. Brown SM, Grissom CK, Moss M, et al. Nonlinear Imputation of Pao<sub>2</sub>/Fio<sub>2</sub> From Spo<sub>2</sub>/Fio<sub>2</sub> Among Patients With Acute Respiratory Distress Syndrome. *Chest* 2016;150(2):307-13. DOI: 10.1016/j.chest.2016.01.003.
13. Pandharipande PP, Shintani AK, Hagerman HE, et al. Derivation and validation of Spo<sub>2</sub>/Fio<sub>2</sub> ratio to impute for Pao<sub>2</sub>/Fio<sub>2</sub> ratio in the respiratory component of the Sequential Organ Failure Assessment score. *Crit Care Med* 2009;37(4):1317-21. DOI: 10.1097/CCM.0b013e31819cefa9.
14. Johnson AE, Pollard TJ, Shen L, et al. MIMIC-III, a freely accessible critical care database. *Sci Data* 2016;3:160035. DOI: 10.1038/sdata.2016.35.

15. Cheng B, Titterington DM. Neural Network: A Review from a Statistical Perspective. *Statist Sci* 1994;9(1):2-30.
16. Friedman JH, Popescu BE. Gradient Directed Regularization for Linear Regression and Classification. Technical Report, Department of Statistics and Stanford Linear Accelerator Center, Stanford University 2004 (<https://statweb.stanford.edu/~jhf/ftp/path.pdf>).
17. Drucker H, Burges CJ, Kaufman L, Smola AJ, Vapnik V. Support vector regression machines. *NIPS'96: Proceedings of the 9th International Conference on Neural Information Processing Systems* 1996:155-161.
18. Suykens J, Vandewalle J. Least Squares Support Vector Machine Classifiers. *Neural Processing Letters* 1999;9:293-300. DOI: <https://doi.org/10.1023/A:1018628609742>.
19. Peng CY, Lee KL, Ingersoll GM. An Introduction to Logistic Regression Analysis and Reporting. *The Journal of Educational Research* 2010;Vol 96, 2002(1):3-14. DOI: <https://doi.org/10.1080/00220670209598786>.
20. Ren S, Zupetic, J., Nouraie, M., Boyce, RD., Lee, JS. Code for the Imputation of PaO<sub>2</sub>/FIO<sub>2</sub> from SpO<sub>2</sub> values from the MIMIC-III Critical Care Database Using Machine-Learning Based Algorithms. Github.com2020.
21. Krough A, Vedelsby J. Neural network ensembles, cross validation and active learning. *NIPS'94: Proceedings of the 7th International Conference on Neural Information Processing Systems* 1994:231-238.
22. Bellani G, Laffey JG, Pham T, et al. Epidemiology, Patterns of Care, and Mortality for Patients With Acute Respiratory Distress Syndrome in Intensive Care Units in 50 Countries. *JAMA* 2016;315(8):788-800. DOI: 10.1001/jama.2016.0291.
23. Rice TW, Wheeler AP, Bernard GR, et al. Comparison of the SpO<sub>2</sub>/FIO<sub>2</sub> ratio and the PaO<sub>2</sub>/FIO<sub>2</sub> ratio in patients with acute lung injury or ARDS. *Chest* 2007;132(2):410-7. DOI: 10.1378/chest.07-0617.
24. Ventilation with lower tidal volumes as compared with traditional tidal volumes for acute lung injury and the acute respiratory distress syndrome. The Acute Respiratory Distress Syndrome Network. *N Engl J Med* 2000;342(18):1301-8. ([http://www.ncbi.nlm.nih.gov/entrez/query.fcgi?cmd=Retrieve&db=PubMed&dopt=Citation&list\\_uids=10793162](http://www.ncbi.nlm.nih.gov/entrez/query.fcgi?cmd=Retrieve&db=PubMed&dopt= Citation&list_uids=10793162)).



**Tables:**

|                 | <b>SF ratio</b> | <b>PEEP</b> | <b>MAP</b> | <b>Temperature</b> | <b>Vasopressor Administration</b> | <b>VT</b> |
|-----------------|-----------------|-------------|------------|--------------------|-----------------------------------|-----------|
| <b>PF ratio</b> | 0.44            | -0.31       | 0.06       | -0.06              | -0.04                             | 0.02      |

**Table 1. Correlation coefficients between PF ratios and variables.** Correlation coefficients between measured PF ratios (PaO<sub>2</sub>/FiO<sub>2</sub>) and the 6 other measured variables (SpO<sub>2</sub>/FiO<sub>2</sub> = SF ratio, PEEP, MAP, Temperature, Vasopressor Administration and VT) were performed. The variable with the strongest correlation coefficient (r) was chosen for the 3 features model.

|                                                               |                      |
|---------------------------------------------------------------|----------------------|
| Total ICU events, N                                           | 20,198               |
| Female sex, n (%)                                             | 8,084 (40.0)         |
| Age in years, mean ( $\pm$ SD)*                               | 64.0 ( $\pm$ 16.2)   |
| PaO <sub>2</sub> /FIO <sub>2</sub> , mean ( $\pm$ SD)         | 310.4 ( $\pm$ 184.4) |
|                                                               |                      |
| Available mean PaO <sub>2</sub> /FIO <sub>2</sub> , N         | 20,198               |
| PaO <sub>2</sub> /FIO <sub>2</sub> >300, n                    | 8996                 |
| PaO <sub>2</sub> /FIO <sub>2</sub> = 201-300, n               | 5226                 |
| PaO <sub>2</sub> /FIO <sub>2</sub> = 101-200, n               | 4448                 |
| PaO <sub>2</sub> /FIO <sub>2</sub> < 100, n                   | 1528                 |
|                                                               |                      |
| Available SpO <sub>2</sub> measurements per unique patient, N | 17,818               |
| 1 measurement, n                                              | 16,065               |
| 2 measurements, n                                             | 1,367                |
| 3 measurements, n                                             | 262                  |
| 4 measurements, n                                             | 77                   |
| 5 measurements, n                                             | 29                   |
| 6 measurements, n                                             | 14                   |
| 7 measurements, n                                             | 4                    |

**Table 2. Subject characteristics based on 3 features.** The 3 features models captured 20,198 ICU events from 17,818 unique patients. Variables included in the 3 features machine learning models are SpO<sub>2</sub>, FiO<sub>2</sub>, and PEEP. \*For subjects older than 89 years, the age was assigned as 90 years of age.

Abbreviations: PEEP= Positive end- expiratory pressure.

|                                  | <b>Entire Dataset 2<br/>(20,198 events)</b> |                | <b>Subset 2 (SpO2 &lt; 97%)<br/>(3,280 events)</b> |               |
|----------------------------------|---------------------------------------------|----------------|----------------------------------------------------|---------------|
|                                  | <b>RMSE</b>                                 | <b>BIC</b>     | <b>RMSE</b>                                        | <b>BIC</b>    |
| <b>Neural Network</b>            | <b>84.7</b>                                 | <b>17952.7</b> | <b>67.5</b>                                        | <b>2778.9</b> |
| <b>Linear Regression</b>         | 88.8                                        | 18144.3        | 68.0                                               | 2783.5        |
| <b>Support Vector Regression</b> | 85.9                                        | 18013.6        | 70.3                                               | 2805.0        |
| <b>Log-linear</b>                | 117.7                                       | NA             | 72.2                                               | NA            |
| <b>Non-linear</b>                | 91.8                                        | NA             | 81.2                                               | NA            |

**Table 3. RMSE and BIC of the 3 features machine learning models regression tasks compared to published methods.** The RMSE and BIC for the 3 features machine learning models were calculated for the entire dataset (20,198 ICU events) and a subset of the dataset with SpO2 < 97% (3,280 ICU events) and compared to the published log-linear and non-linear models.

Abbreviations: RMSE = Root Mean Square Error; BIC = Bayesian Information Criterion; NA = not applicable.

|                      | Entire Dataset 2<br>(20,198 events) |                     |          |            |            | Subset 2 (SpO2 < 97%)<br>(3,280 events) |                     |         |            |            |
|----------------------|-------------------------------------|---------------------|----------|------------|------------|-----------------------------------------|---------------------|---------|------------|------------|
|                      | Neural Network                      | Logistic Regression | SVM      | Log-linear | Non-linear | Neural Network                          | Logistic regression | SVM     | Log-linear | Non-linear |
| <b>Total, No.</b>    | 20198                               | 20198               | 20198    | 20198      | 20198      | 3280                                    | 3280                | 3280    | 3280       | 3280       |
| <b>Sensitivity</b>   | 0.96                                | 0.97                | 0.98     | 0.84       | 0.93       | 0.80                                    | 0.87                | 0.83    | 0.85       | 0.58       |
| <b>Specificity</b>   | 0.39                                | 0.26                | 0.33     | 0.56       | 0.49       | 0.76                                    | 0.59                | 0.69    | 0.59       | 0.89       |
| <b>Positive LR</b>   | 1.59                                | 1.32                | 1.46     | 1.90       | 1.83       | 3.37                                    | 2.13                | 2.75    | 2.09       | 5.16       |
| <b>Negative LR</b>   | 0.09                                | 0.10                | 0.07     | 0.29       | 0.15       | 0.27                                    | 0.23                | 0.25    | 0.25       | 0.47       |
| <b>Diagnostic OR</b> | 17.12                               | 13.16               | 19.68    | 6.49       | 12.61      | 12.53                                   | 9.46                | 10.96   | 8.44       | 10.94      |
| <b>AUROC</b>         | <b>0.83</b>                         | 0.81                | 0.74     | NA         | NA         | <b>0.85</b>                             | 0.83                | 0.84    | NA         | NA         |
| <b>F1</b>            | 0.92                                | 0.92                | 0.92     | 0.87       | 0.91       | <b>0.81</b>                             | 0.80                | 0.81    | 0.79       | 0.70       |
| <b>BIC</b>           | <b>-4612.60</b>                     | -4440.70            | -4446.00 | NA         | NA         | <b>-591.80</b>                          | -567.00             | -580.00 | NA         | NA         |

**Table 4. Prediction performance of machine learning classification models based on 3 features.** Prediction performance statistics were calculated for the machine learning models based on 3 features and compared to the Log-linear and Non-linear methods for the entire dataset (20,198 ICU events; entire dataset 2) and for a subset of the events where SpO2 <97% (3,280 events; subset 2). Variables included in the 3 features machine learning models are SpO2, FiO2, and PEEP.

Abbreviations: SVM = Support Vector Machine; Positive LR = Positive Likelihood Ratio; Negative LR = Negative Likelihood Ratio; Diagnostic OR = Diagnostic Odds Ratio (Ratio of Positive Likelihood Ratio/ Negative Likelihood Ratio); AUROC = Area Under Receiver Operating Characteristic Curve; F1= F1 score; BIC = Bayesian Information Criterion; NA = Not applicable.

**Figures:**

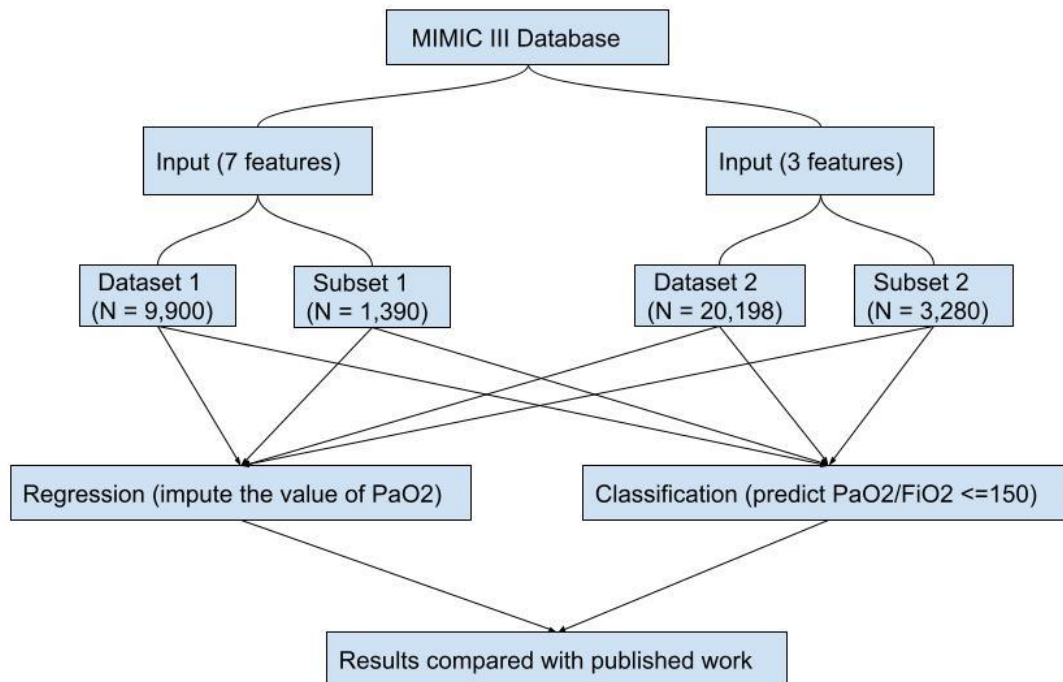

**Figure 1. Overview of the experimental study design.**

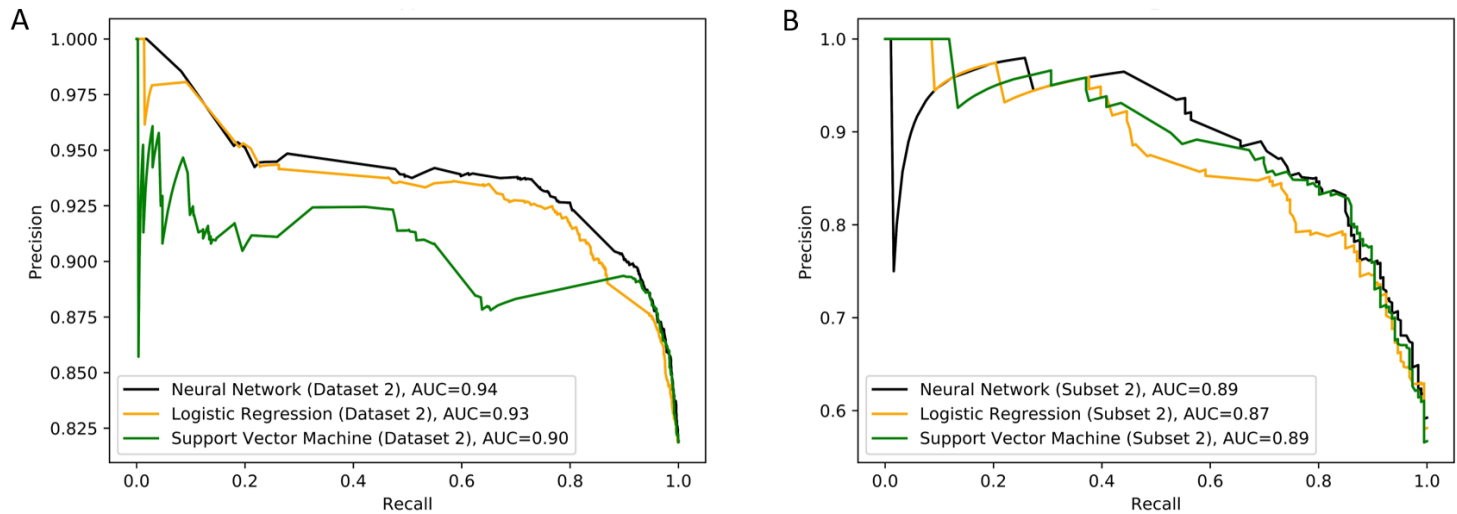

**Figure 2: Precision-recall curves of machine learning models in Dataset 2 and Subset 2 using 3 features.** The precision recall curves, where improved performance is demonstrated if the curve is closer to the upper right-hand corner or has the highest area under the curve (AUC), are shown for the 3 machine learning models for A) the entire Dataset 2 (N = 20,198) ICU events) and B) Subset 2 where SpO<sub>2</sub> <97% (N = 3,280 ICU events).
